# Supplementary material
Source: PubMed Central journal article supplement (PMC2268511)
Supplement: eukcell_7_3_454__1.pdf [file eukcell_7_3_454__1.pdf]

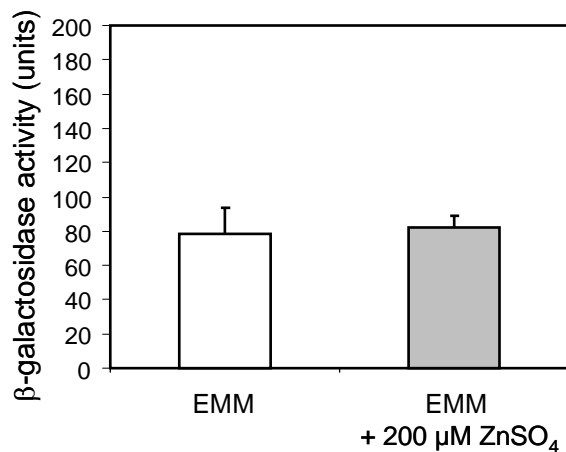

**Figure S1. The expression of the *adh4-lacZ* reporter is not affected by excess zinc.** Wild type cells carrying the *adh4-lacZ* reporter (pSPE356-*adh4*) were cultured at 30°C in EMM or EMM medium supplemented with a further 200 μM ZnSO<sub>4</sub> until proliferating exponentially. Cells were harvested and processed for β-galactosidase activity. Note EMM is a defined medium whose ZnSO<sub>4</sub> concentration is 1.4 μM.

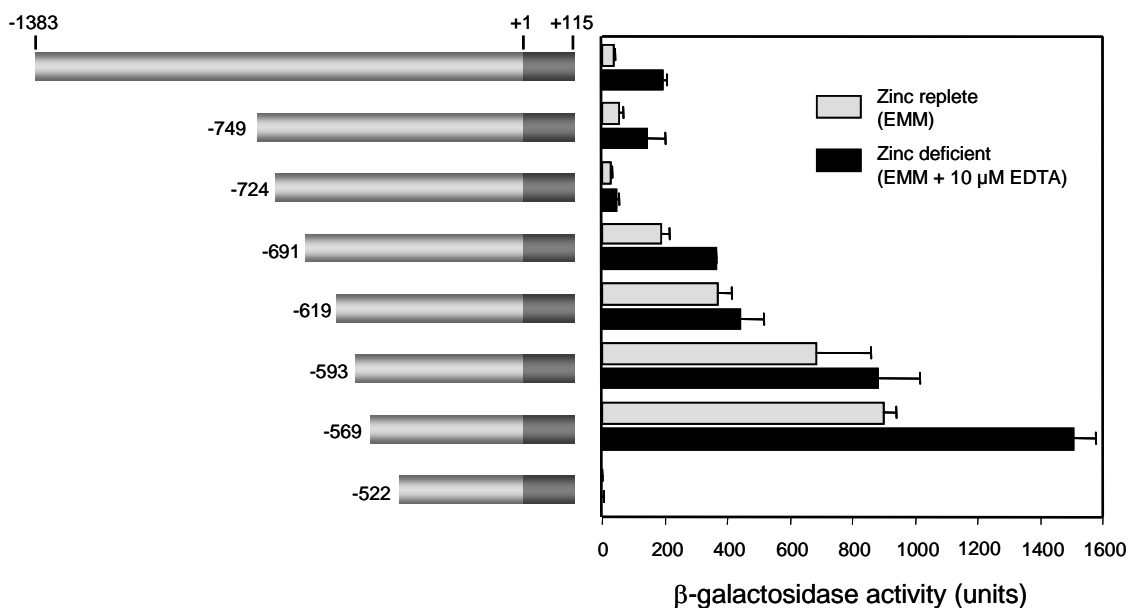

**Figure S2 Truncation analysis of the *adh4-lacZ* reporter.** Wild type cells carrying the indicated 5'-truncated *adh4-lacZ* reporter were cultured at 30°C in EMM (zinc replete conditions) or EMM medium supplemented with 10 μM EDTA (zinc deficient conditions) until proliferating exponentially and then harvested and processed for β-galactosidase activity. Metal content analysis estimated that cells grown in EMM medium (zinc replete conditions) contained  $3.7 \times 10^8$  atoms of zinc per cell whereas cells grown in EMM + 10 μM EDTA (zinc deficient conditions) contained  $2.8 \times 10^7$  atoms of zinc per cell.
